# Supplementary material for: Screening of immunosuppressive factors for biomarkers of breast cancer malignancy phenotypes and subtype-specific targeted therapy
Source: PeerJ. 2019 Jun 27;7:e7197. doi: 10.7717/peerj.7197 (PMC6599676; doi:10.7717/peerj.7197)
Supplement: Supplemental Information 5 [file peerj-07-7197-s005.xlsx]

## Sheet: Sheet1
GELPRO
	1						1
	CD274						actin
	Lanes:	Lane 1	Lane 2	Lane 3	Lane 4		Lanes:	Lane 1	Lane 2	Lane 3	Lane 4
	Bands	(IOD)	(IOD)	(IOD)	(IOD)		Bands	(IOD)	(IOD)	(IOD)	(IOD)
	1	791.37	828.91	3039.9	10174		1	9636.9	14321	11017	22485
	CD274 gray value		1	2	3		2
		T47D	0.0821187	0.0169821	0.0184364			actin						CD274
		MCF7	0.0578807	0.0208597	0.0225402			Lanes:	Lane 1	Lane 2	Lane 3	Lane 4		Lanes:	Lane 1	Lane 2	Lane 3	Lane 4
		BT549	0.275928	0.136457	0.164507			Bands	(IOD)	(IOD)	(IOD)	(IOD)		Bands	(IOD)	(IOD)	(IOD)	(IOD)
		MDA-MB-231	0.452479	0.388266	0.379123			1	8343.5	12725	10031	20513		1	141.69	265.44	1368.8	7964.5
							3
								actin						CD274
								Lanes:	Lane 1	Lane 2	Lane 3	Lane 4		Lanes:	Lane 1	Lane 2	Lane 3	Lane 4
								Bands	(IOD)	(IOD)	(IOD)	(IOD)		Bands	(IOD)	(IOD)	(IOD)	(IOD)
								1	9031.6	13109	10171	21143		1	166.51	295.48	1673.2	8015.8
		actin
	IMAGE J	1						2						3
		1	0.014	144.915	1.979	1979099		1	0.013	147.53	1.98	1979705		1	0.016	131.776	2.053	2052800
		2	0.012	165.519	2.028	2028433		2	0.013	159.462	2.036	2036329		2	0.012	171.21	2.005	2005380
		3	0.013	159.105	2.147	2147276		3	0.014	152.264	2.162	2161691		3	0.015	147.576	2.244	2243891
		4	0.013	195.722	2.597	2596836		4	0.015	181.586	2.693	2693288		4	0.017	172.868	2.858	2858021
		CD274
		1						2						3
		1	0.006	15.455	0.089	89451		1	0.01	12.746	0.13	129602		1	0.009	13.38	0.126	126023
		2	0.009	16.455	0.143	143323		2	0.007	18.021	0.127	127137		2	0.007	18.059	0.129	128689
		3	0.012	53.284	0.623	623474		3	0.016	44.299	0.708	707678		3	0.015	46.125	0.698	697639
		4	0.014	78.847	1.13	1129637		4	0.015	76.885	1.149	1149205		4	0.013	83.954	1.116	1115585
		CD274 gray value		1	2	3								T47D	MCF7	BT549	MDA-MB-231
			T47D	0.0449722	0.0656566	0.0613736								0.0449722	0.0705128	0.290172	0.435117
			MCF7	0.0705128	0.0623772	0.0643392								0.0656566	0.0623772	0.327475	0.426662
			BT549	0.290172	0.327475	0.311052								0.0613736	0.0643392	0.311052	0.390483
			MDA-MB-231	0.435117	0.426662	0.390483
GELPRO		IL8								actin
		1								1
		Lanes:	Lane 1	Lane 2	Lane 3	Lane 4				Lanes:	Lane 1	Lane 2	Lane 3	Lane 4
		Bands	(IOD)	(IOD)	(IOD)	(IOD)				Bands	(IOD)	(IOD)	(IOD)	(IOD)
		1	50.958	216.87	104.46	1825.3				1	14400	17914	4911.9	6041.9
		Sum	50.958	216.87	104.46	1825.3				Sum	14400	17914	4911.9	6041.9
		In Lane	138.63	286.57	171.73	1870				In Lane	14454	18033	5267.7	6174.1
		2								2
		Lanes:	Lane 1	Lane 2	Lane 3	Lane 4				Lanes:	Lane 1	Lane 2	Lane 3	Lane 4
		Bands	(IOD)	(IOD)	(IOD)	(IOD)				Bands	(IOD)	(IOD)	(IOD)	(IOD)
		1	52.875	213.96	180.97	1868				1	14295	18074	5033	5734.6
		Sum	52.875	213.96	180.97	1868				Sum	14295	18074	5033	5734.6
		In Lane	135.36	262.26	235.96	1916				In Lane	14342	18114	5263.2	5792.8
		3								3
		Lanes:	Lane 1	Lane 2	Lane 3	Lane 4				Lanes:	Lane 1	Lane 2	Lane 3	Lane 4
		Bands	(IOD)	(IOD)	(IOD)	(IOD)				Bands	(IOD)	(IOD)	(IOD)	(IOD)
		1	168.69	743.95	129.12	2112.9				1	14353	17970	4886.9	5796
		Sum	168.69	743.95	129.12	2112.9				Sum	14353	17970	4886.9	5796
		In Lane	253.94	792.9	180.21	2163.2				In Lane	14398	18101	5054.2	5840.5
		IL8 gray value		1	2	3		T47D	MCF7	BT549	MDA-MB-231
			T47D	0.00353875	0.00369885	0.0117529		0.00353875	0.0121062	0.0212667	0.302107
			MCF7	0.0121062	0.011838	0.0413996		0.00369885	0.011838	0.0359567	0.325742
			BT549	0.0212667	0.0359567	0.0264217		0.0117529	0.0413996	0.0264217	0.364545
			MDA-MB-231	0.302107	0.325742	0.364545
